# Supplementary material for: Ru nanoparticles supported on nitrogen-doped porous carbon derived from ZIF-8 as an efficient catalyst for the selective hydrogenation of p-chloronitrobenzene and p-bromonitrobenzene
Source: Royal Society of Chemistry journal article supplement (doi:10.1039/c6dt02678h), 2016-01-01
Supplement: c6dt02678h1.pdf [file c6dt02678h1.pdf]

**Ru nanoparticles supported on nitrogen-doped porous carbon  
derived from ZIF-8 as efficient catalyst for selective hydrogenation of  
p-chloronitrobenzene and p-bromonitrobenzene.**

Xinlin Li, Shiling Zhao, Wei Zhang, Yansheng Liu, and Rong Li \*

*College of Chemistry and Chemical Engineering, Gansu Provincial Engineering Laboratory for  
Chemical Catalysis, Lanzhou University, Lanzhou 730000, PR China*

\*Corresponding author.

Tel.: +86 0931 8912311; fax: +86 0931 8912582.

E-mail address: liyirong@lzu.edu.cn (Rong Li)

## 1. Experimental

### 1) Preparation of nitrogen doped activated carbon (NAC)

0.3 g of CAC was totally dispersed in 30ml of ethanol under ultrasound. Then 0.08 g of dicyandiamide was added. The system was stirred for 12 hours and then the solvent was rotary evaporated at 40 ° C. The black powder was calcinated under nitrogen flow at 600° C for 2 hours to obtain NAC. N content determined by elemental analysis is 1.2%.

### 2) Preparation of Ru/NAC (5wt%)

The procedure to prepare Ru5/NAC is similar to that of Ru5/NPC(NB). NAC was chosen as support instead of NPC. Ru content is 4.7wt% (determined by ICP).

### 3) Preparation of Ru/CAC (5wt%)

The procedure to prepare Ru5/AC is similar to that of Ru5/NPC(NB). CAC was chosen as support instead of NPC. Ru content is 4.5wt% (determined by ICP).

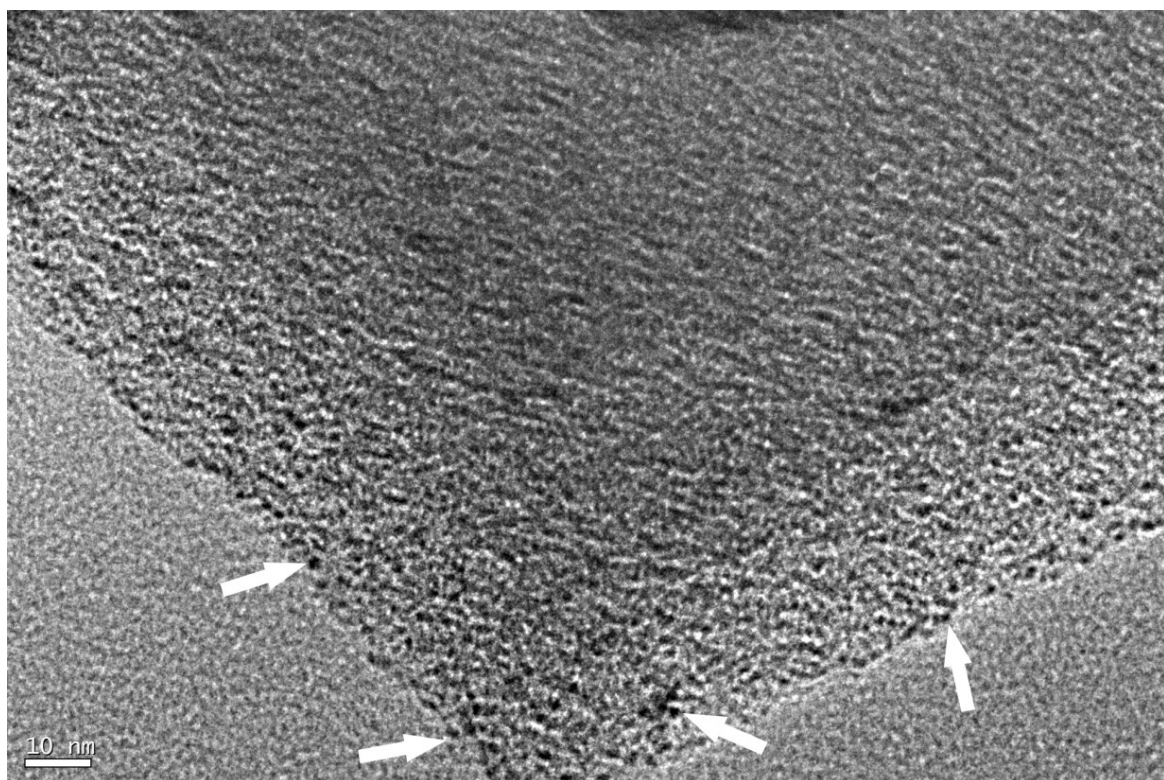

Figure S1. TEM image of Ru5/NPC(NB).

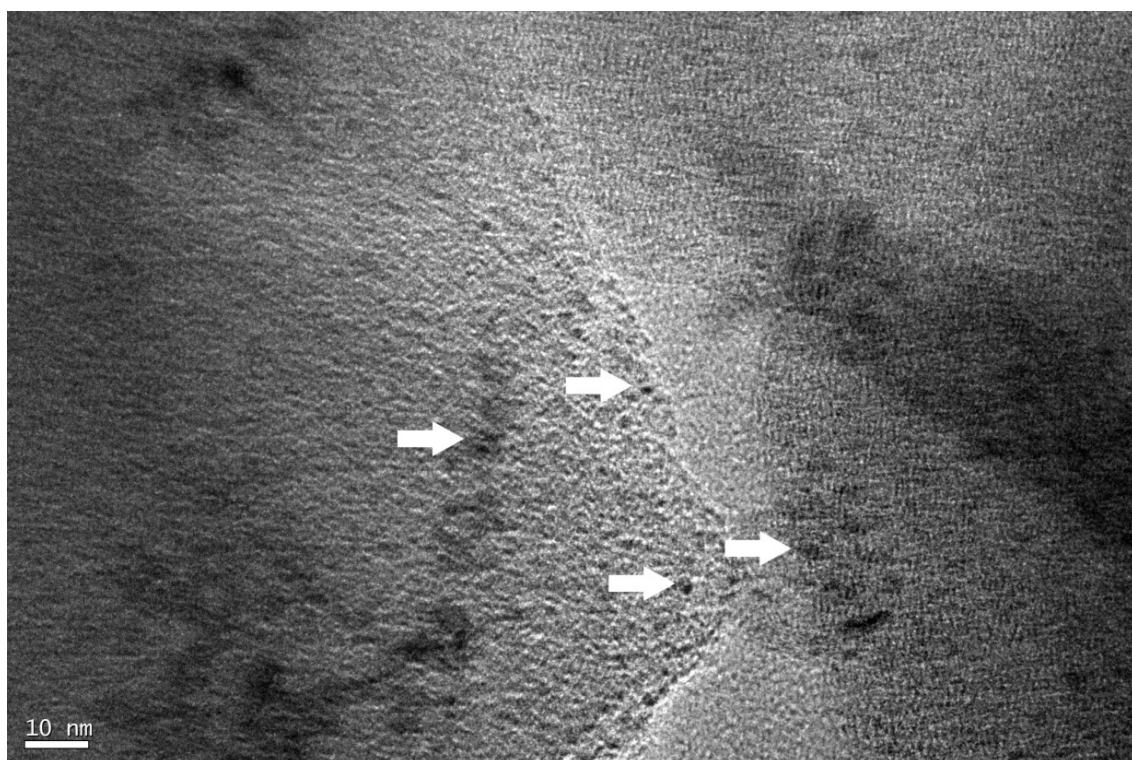

Figure S2. TEM image of Ru5/NPC(H<sub>2</sub>-AC)

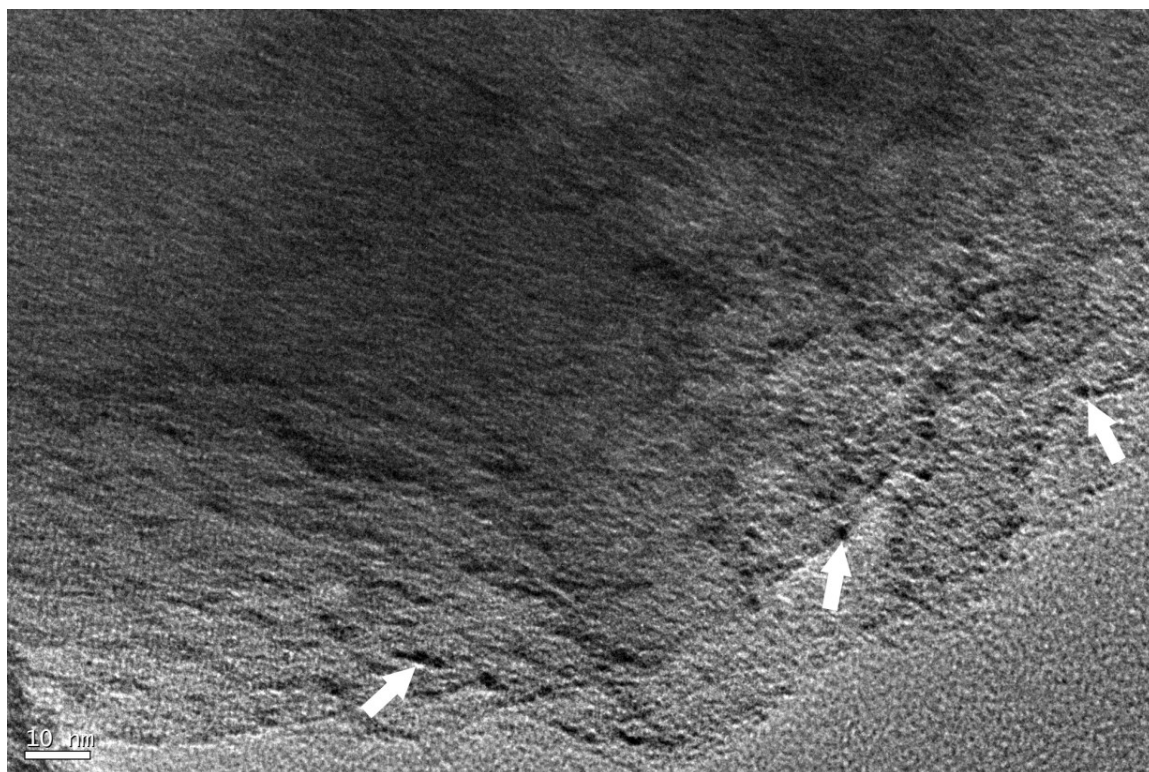

Figure S3. TEM image of Ru5/NPC(H<sub>2</sub>-H<sub>2</sub>O)

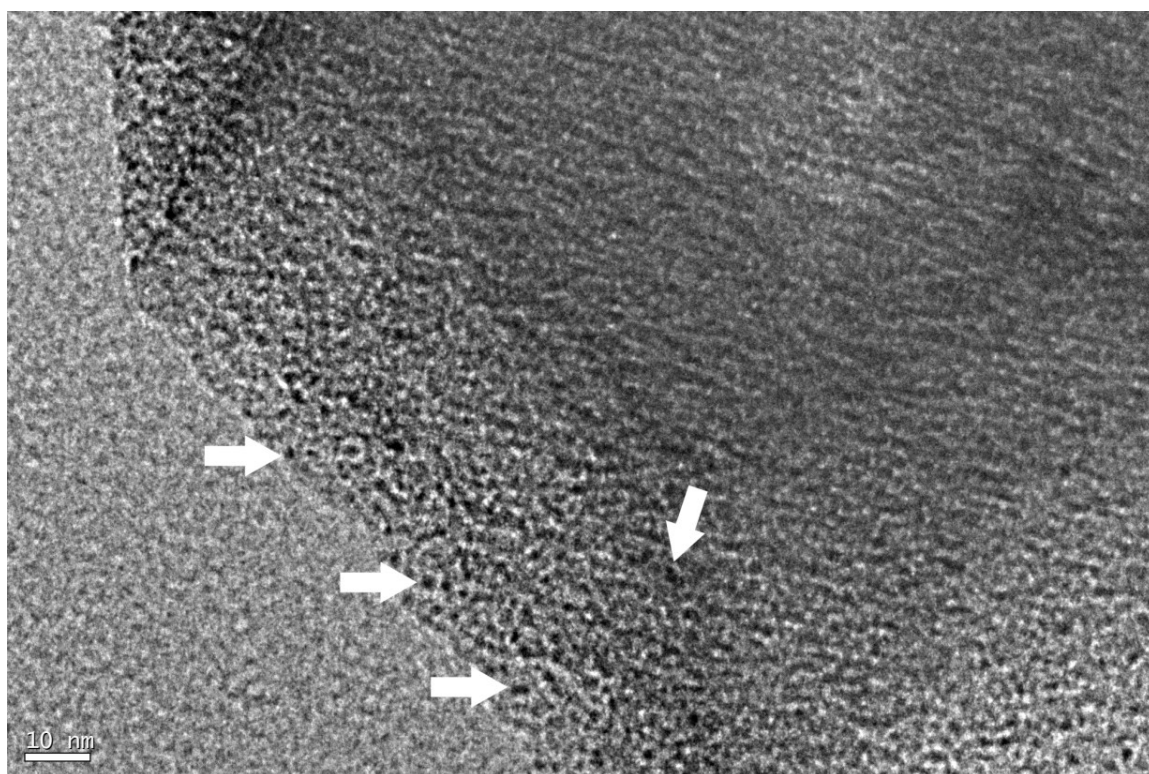

Figure S4. TEM image of Ru3/NPC(NB)

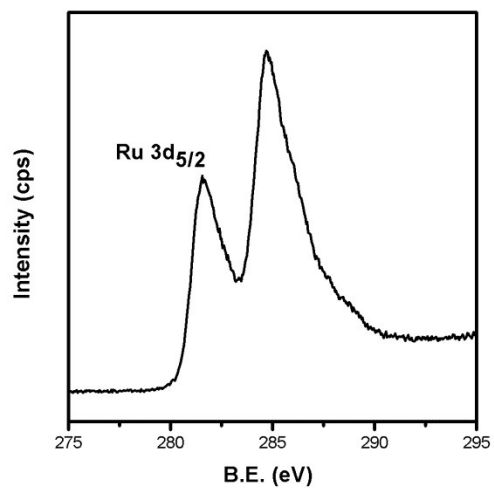

Figure S5. XPS spectra of C 1s and Ru 3d<sub>5/2</sub> in Ru5/NPC(NB).

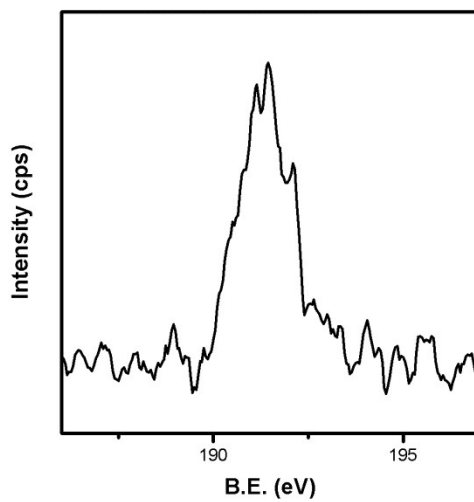

Figure S6. XPS spectra of B 1s in Ru5/NPC(NB).

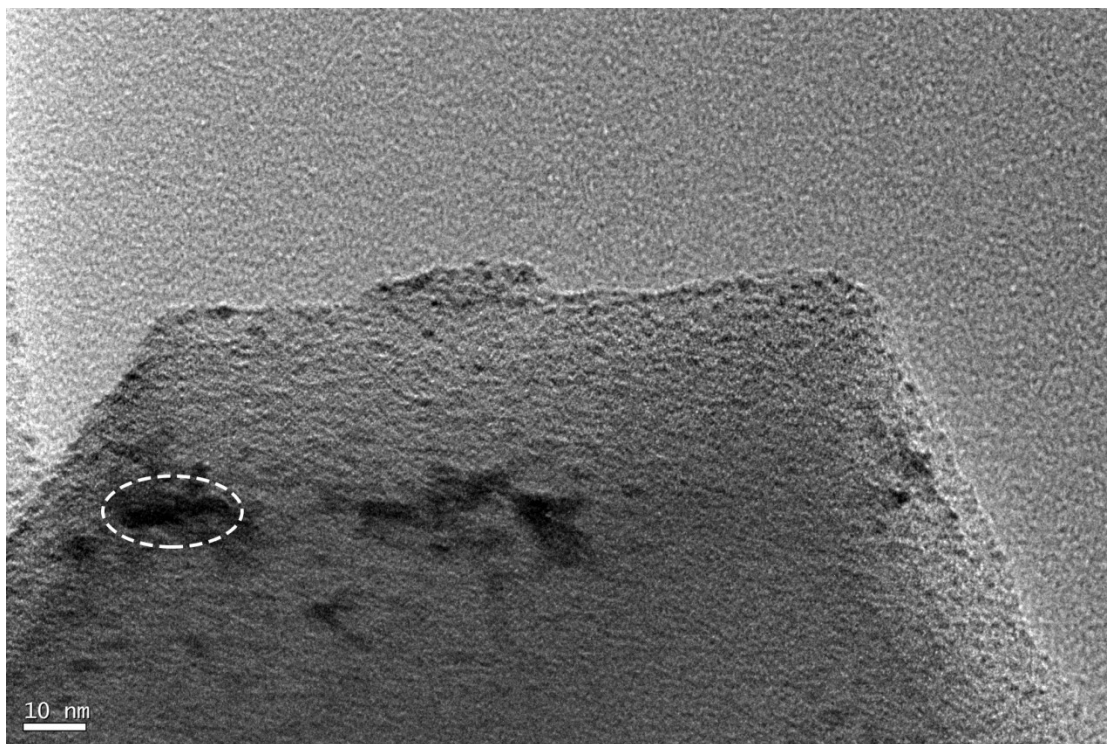

Figure S7. TEM image of regional agglomeration of Ru<sub>3</sub>/NPC(NB).
